# Supplementary material for: Molecular Modeling of µ Opioid Receptor Ligands with Various Functional Properties: PZM21, SR-17018, Morphine, and Fentanyl—Simulated Interaction Patterns Confronted with Experimental Data
Source: MDPI journal article supplement (doi:10.3390/molecules25204636), 2020-10-12
Supplement: s1 [file s1]

**Table S1.** In vitro and in vivo data used in the study (expressed in the form of the pEC50 values).

| <b>Compound/parameter</b> | <b>Gai2<br/>activation</b> | <b>cAMP<br/>inhibition</b> | <b>bArr2<br/>recruitment</b> | <b>Rab5<br/>trafficking</b> | <b>GIRK<br/>activation</b> | <b>GRK2<br/>recruitment</b> |
|---------------------------|----------------------------|----------------------------|------------------------------|-----------------------------|----------------------------|-----------------------------|
| PZM21                     | 103                        | 100                        | 70                           | 88                          | 95                         | 105                         |
| SR17018                   | 98                         | 97                         | 28                           | 75                          | 88                         | 66                          |
| Morphine                  | 86                         | 84                         | 14                           | 51                          | 86                         | 36                          |
| Fentanyl                  | 61                         | 62                         | 12                           | 59                          | 78                         | 41                          |
