# Supplementary figures and images for: Molecular Modeling of µ Opioid Receptor Ligands with Various Functional Properties: PZM21, SR-17018, Morphine, and Fentanyl—Simulated Interaction Patterns Confronted with Experimental Data
Source: MDPI journal article supplement (doi:10.3390/molecules25204636), 2020-10-12

Gai2 activation

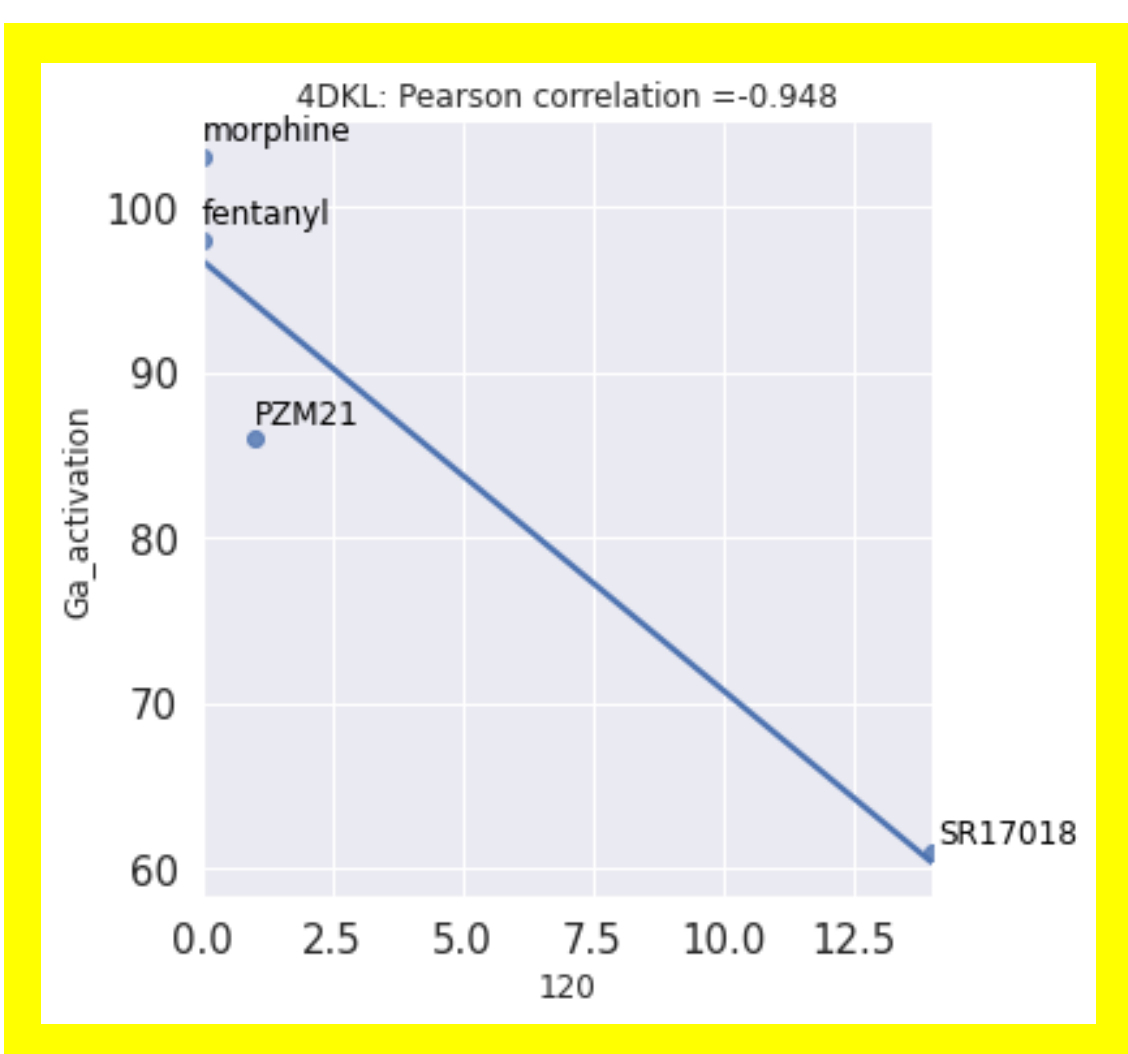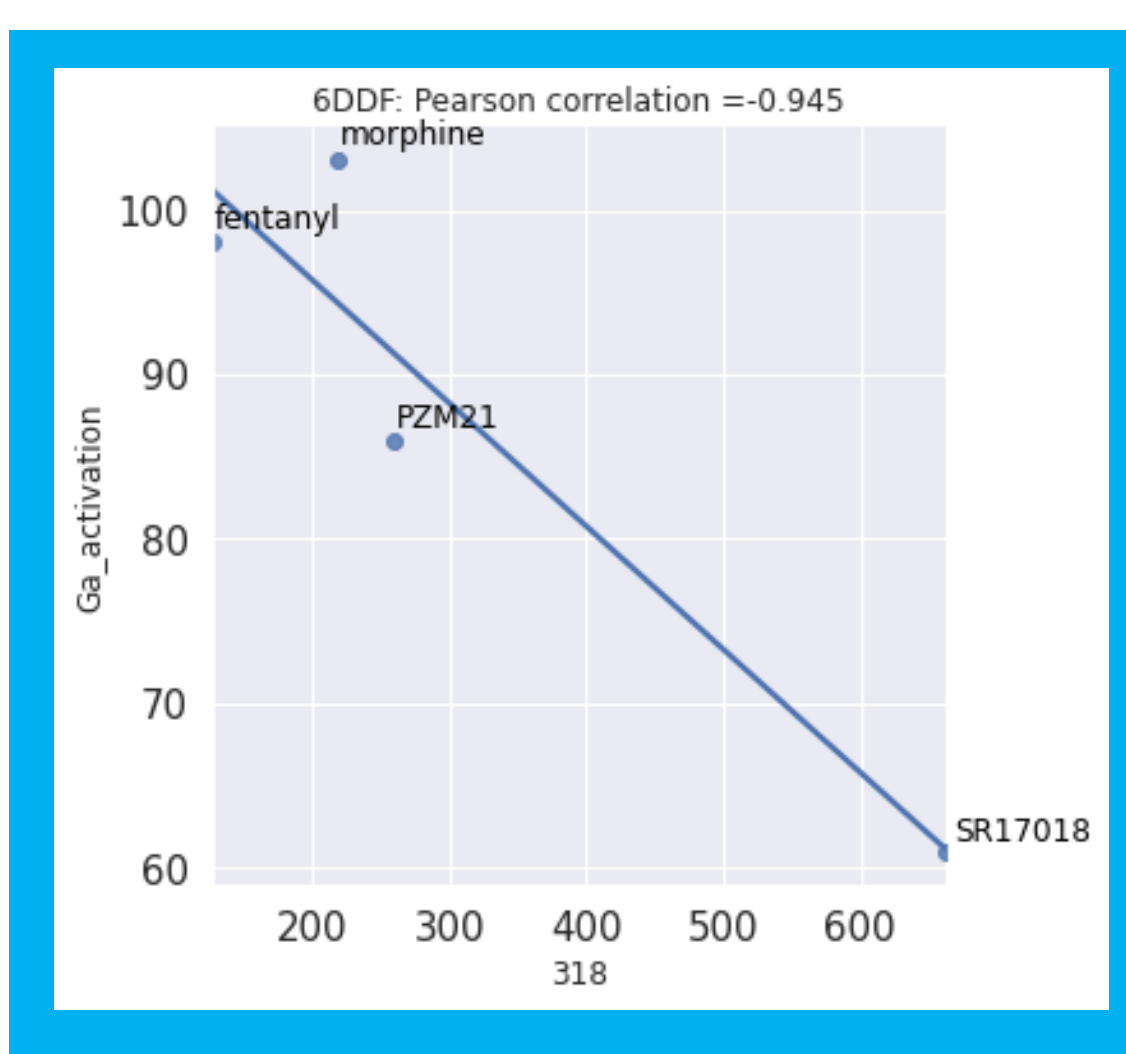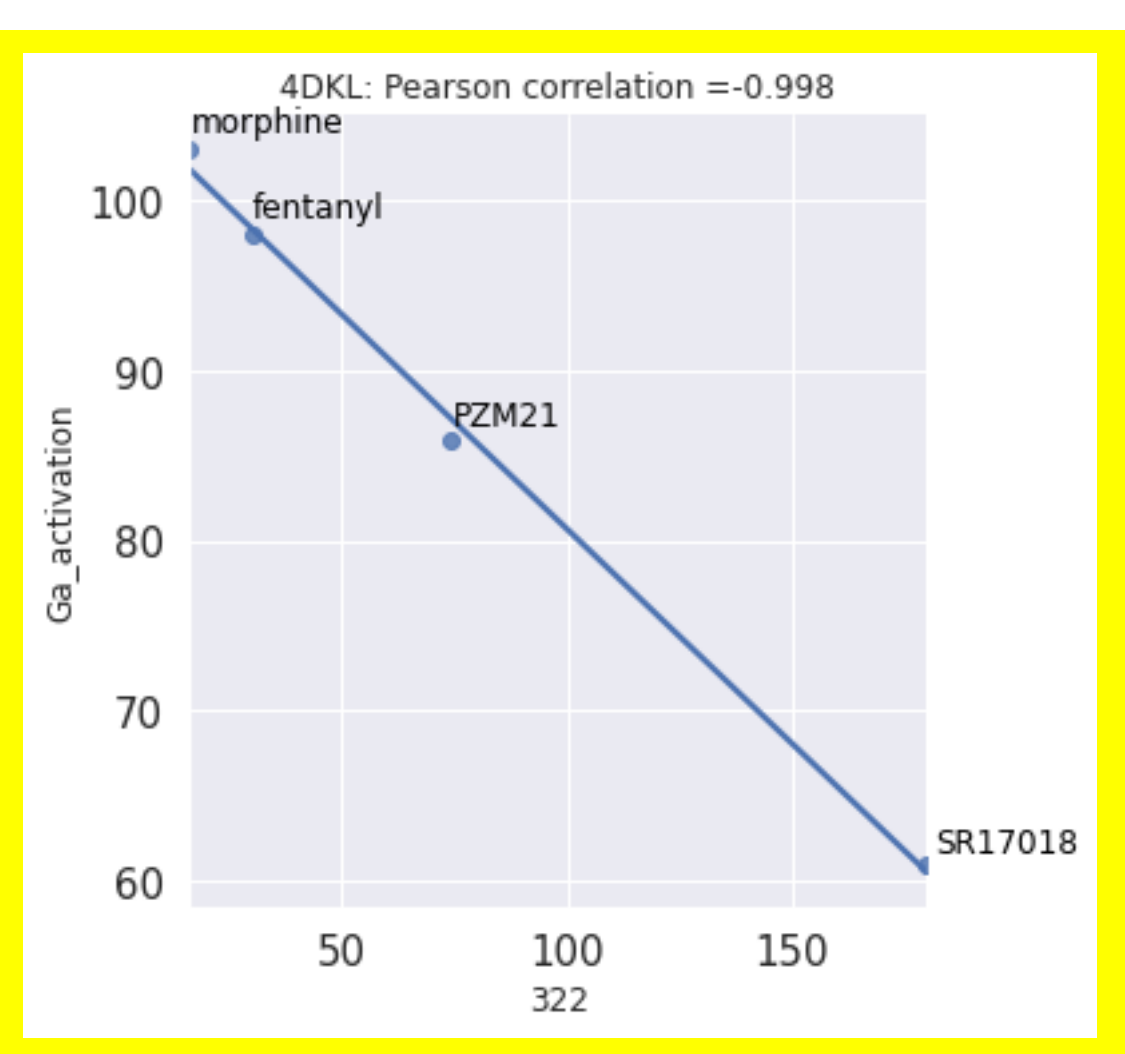

cAMP inhibition

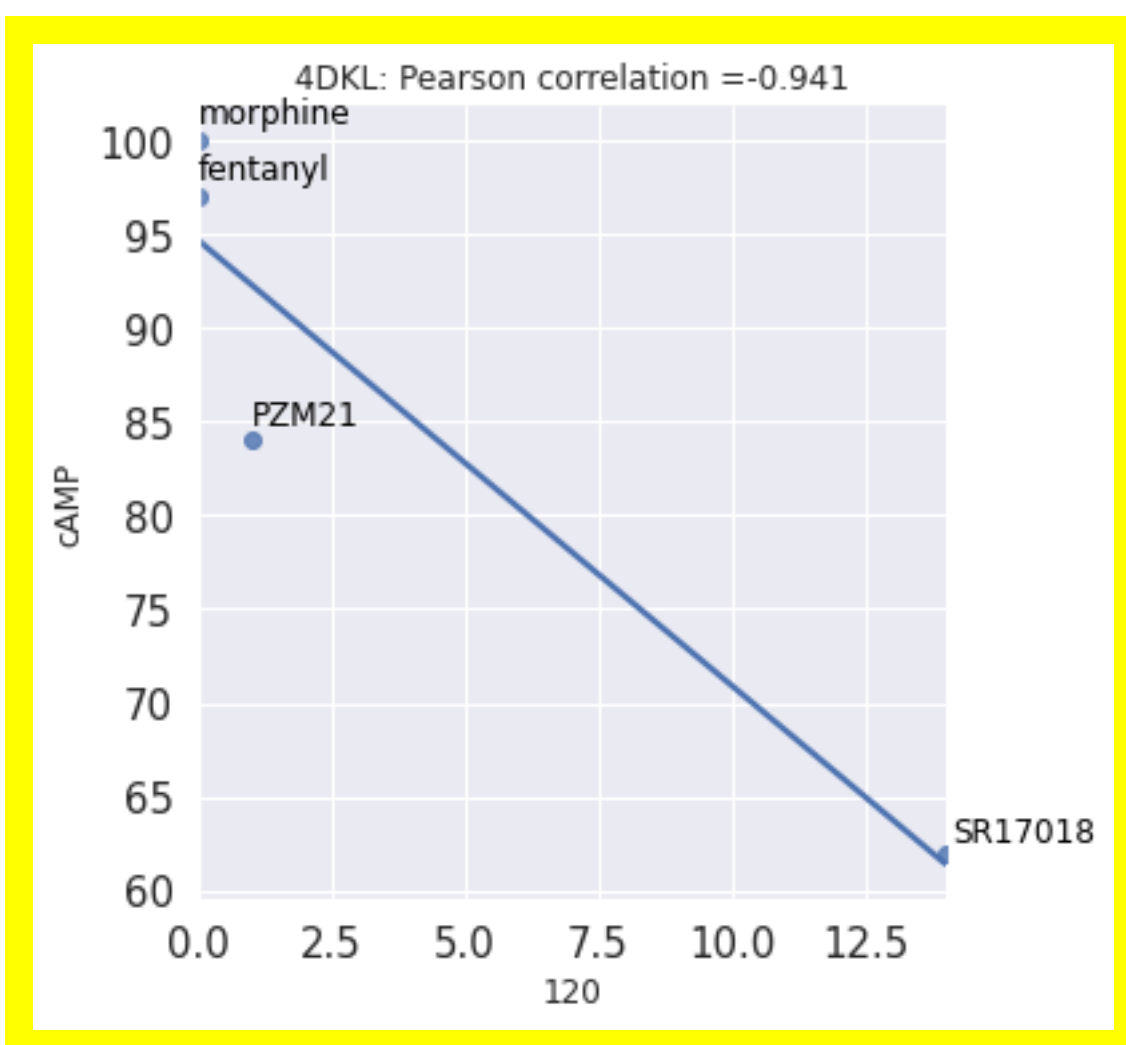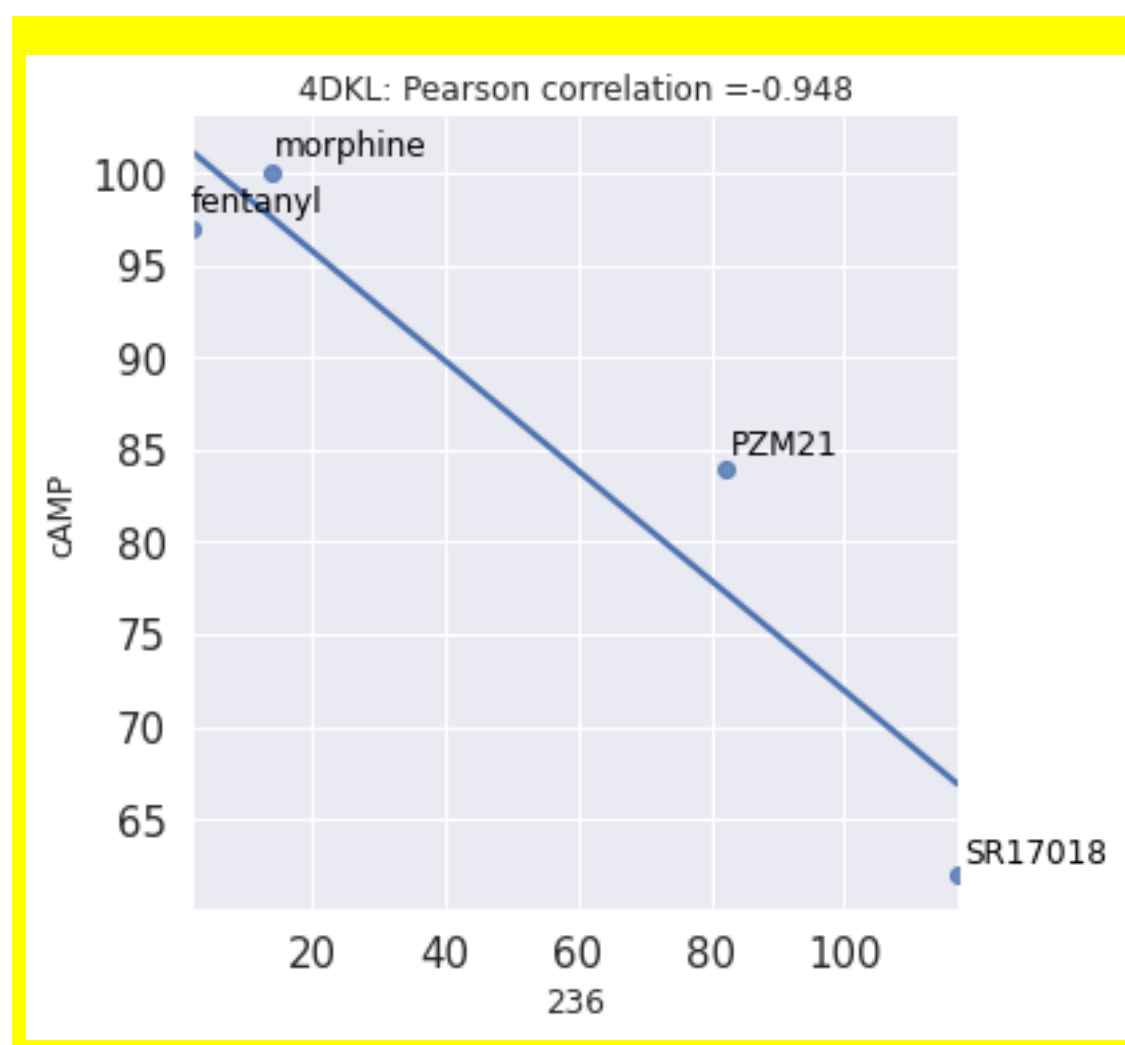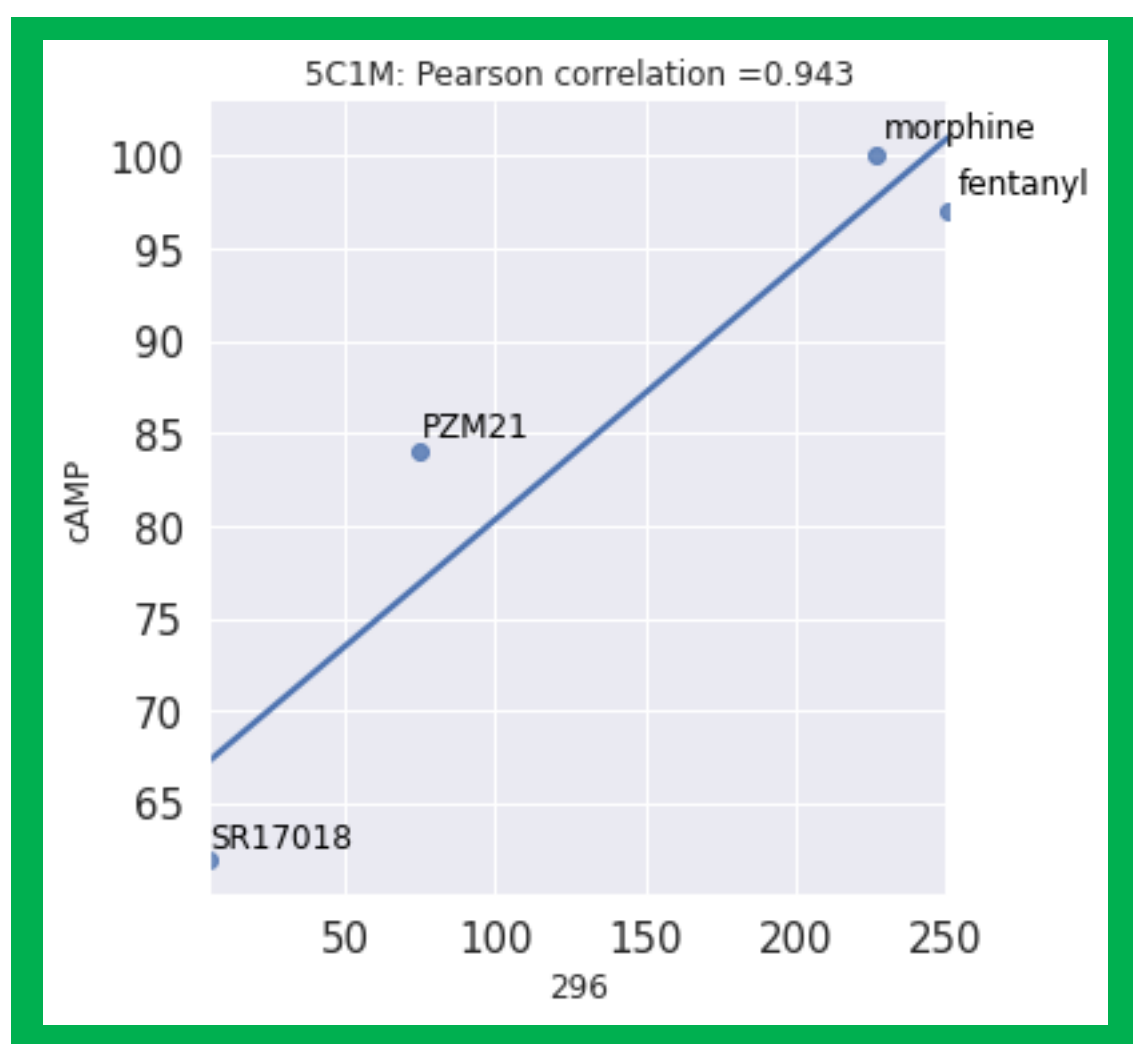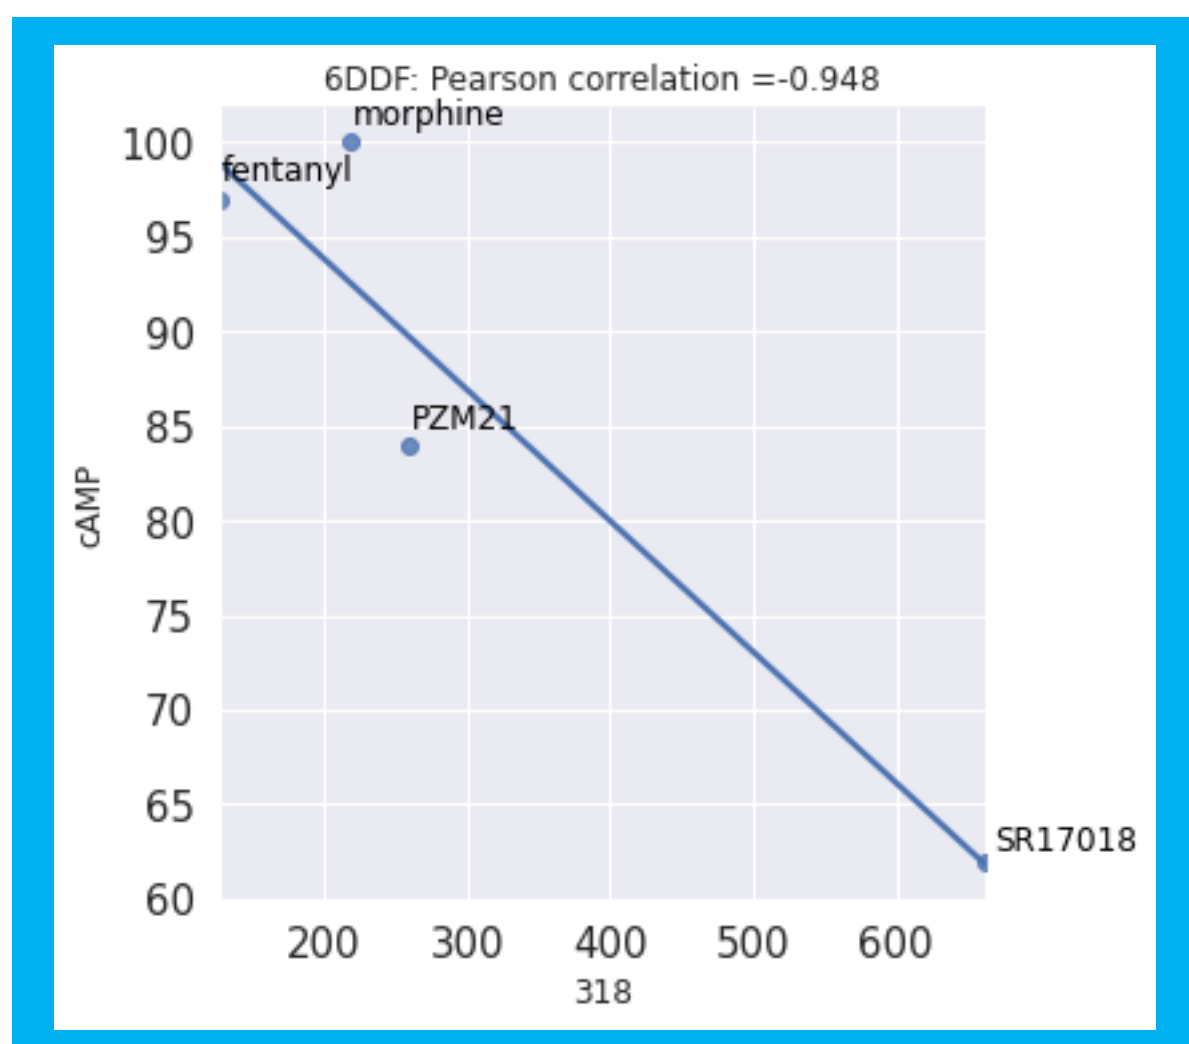

bArr2 recruitment

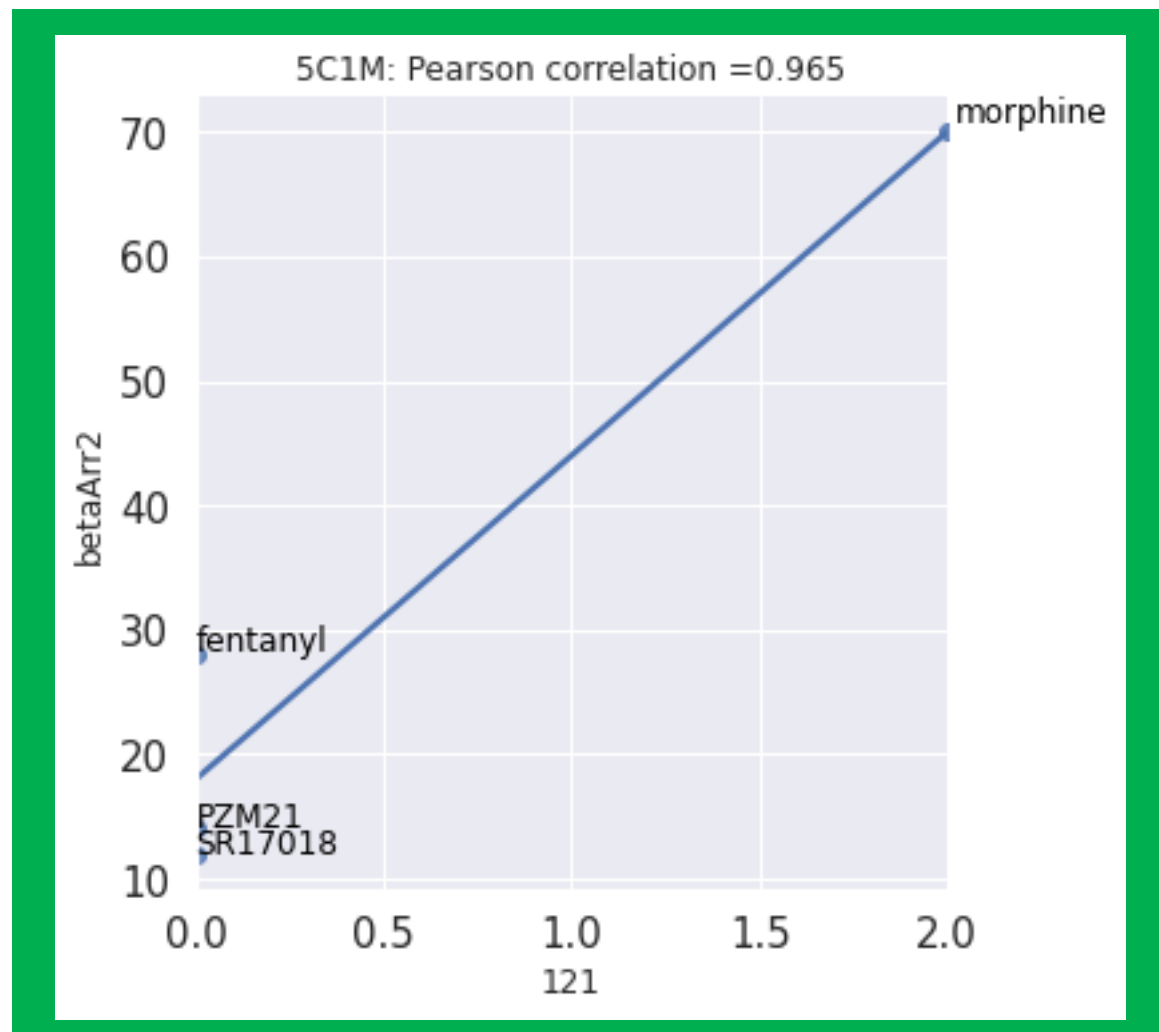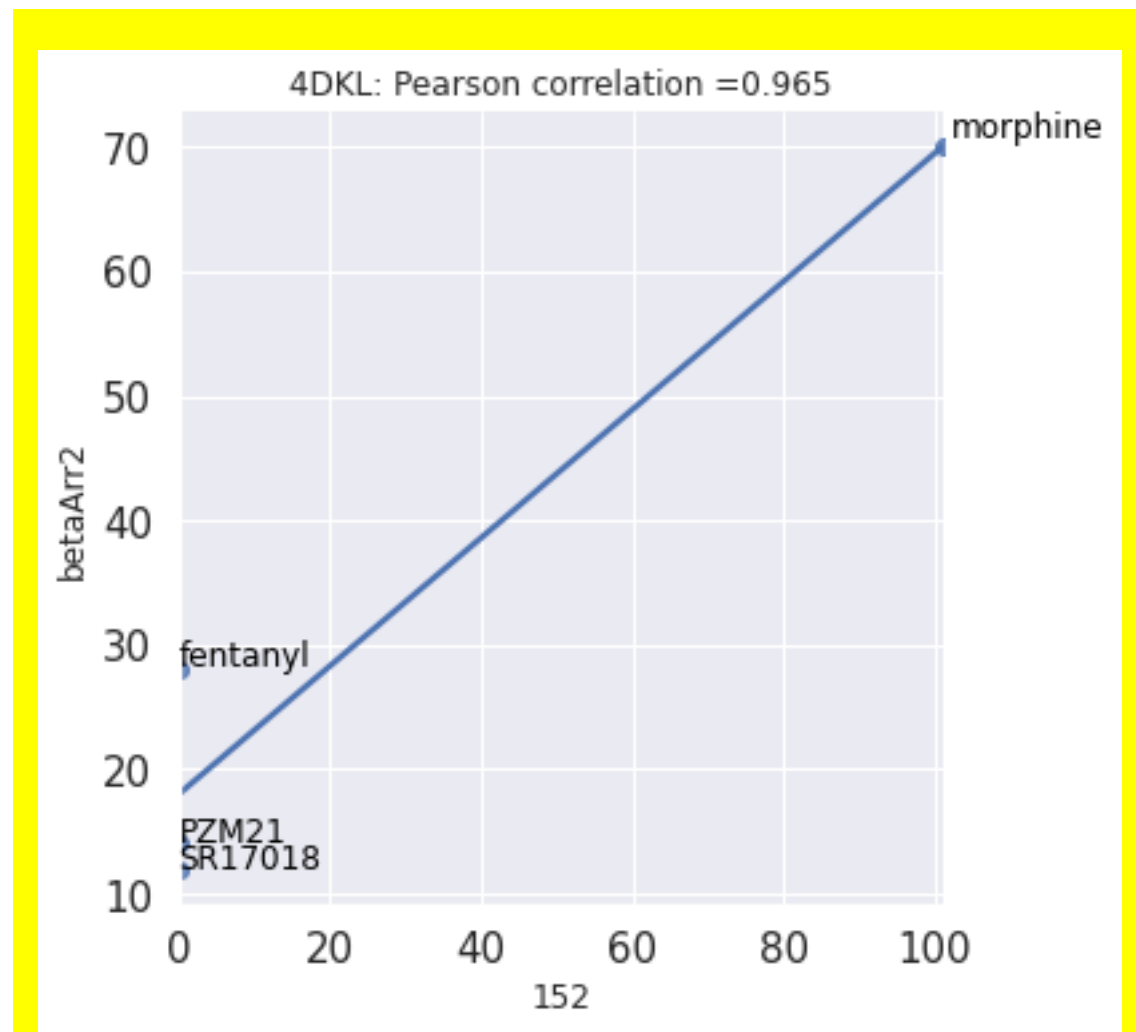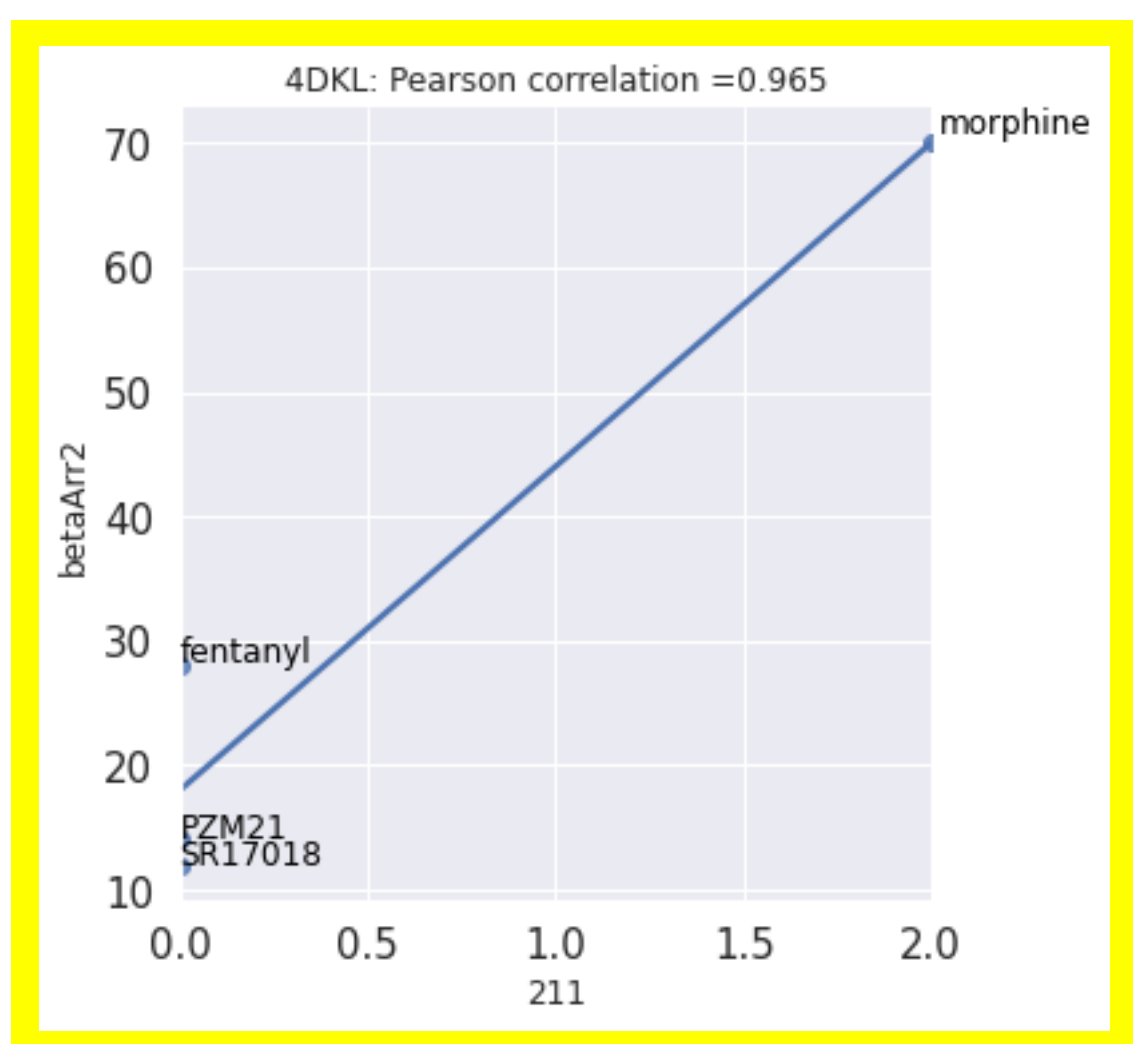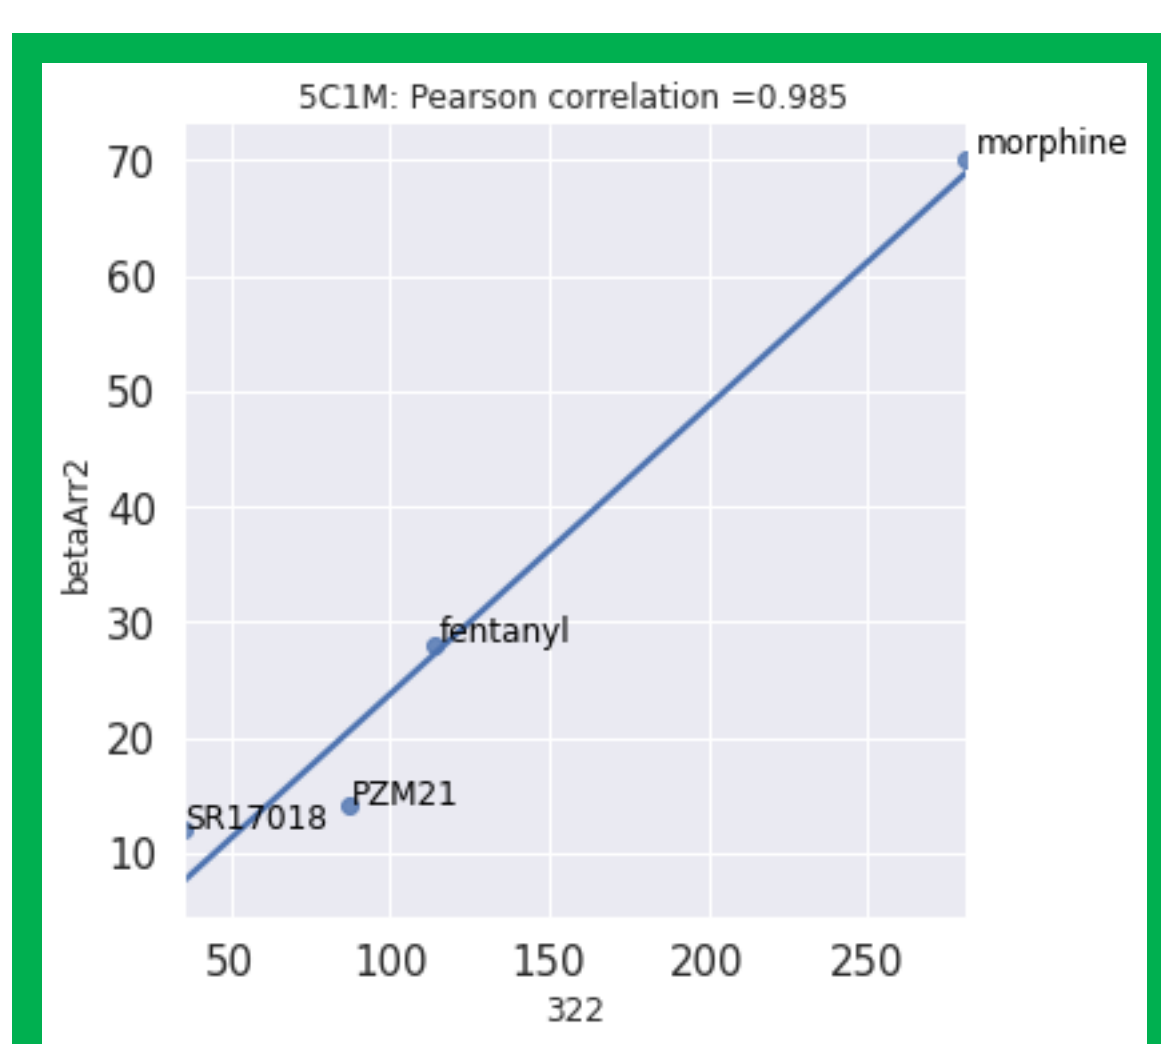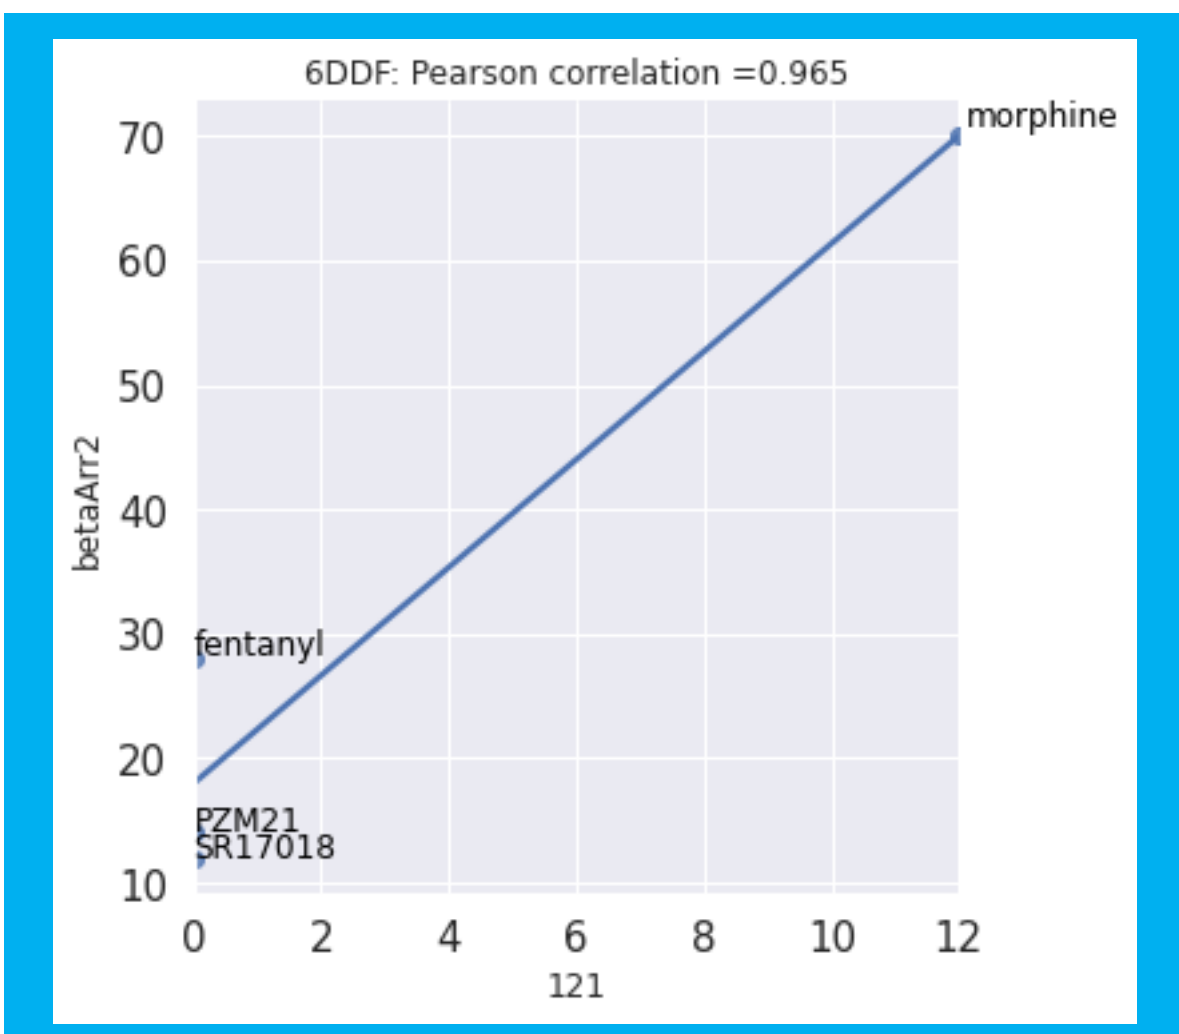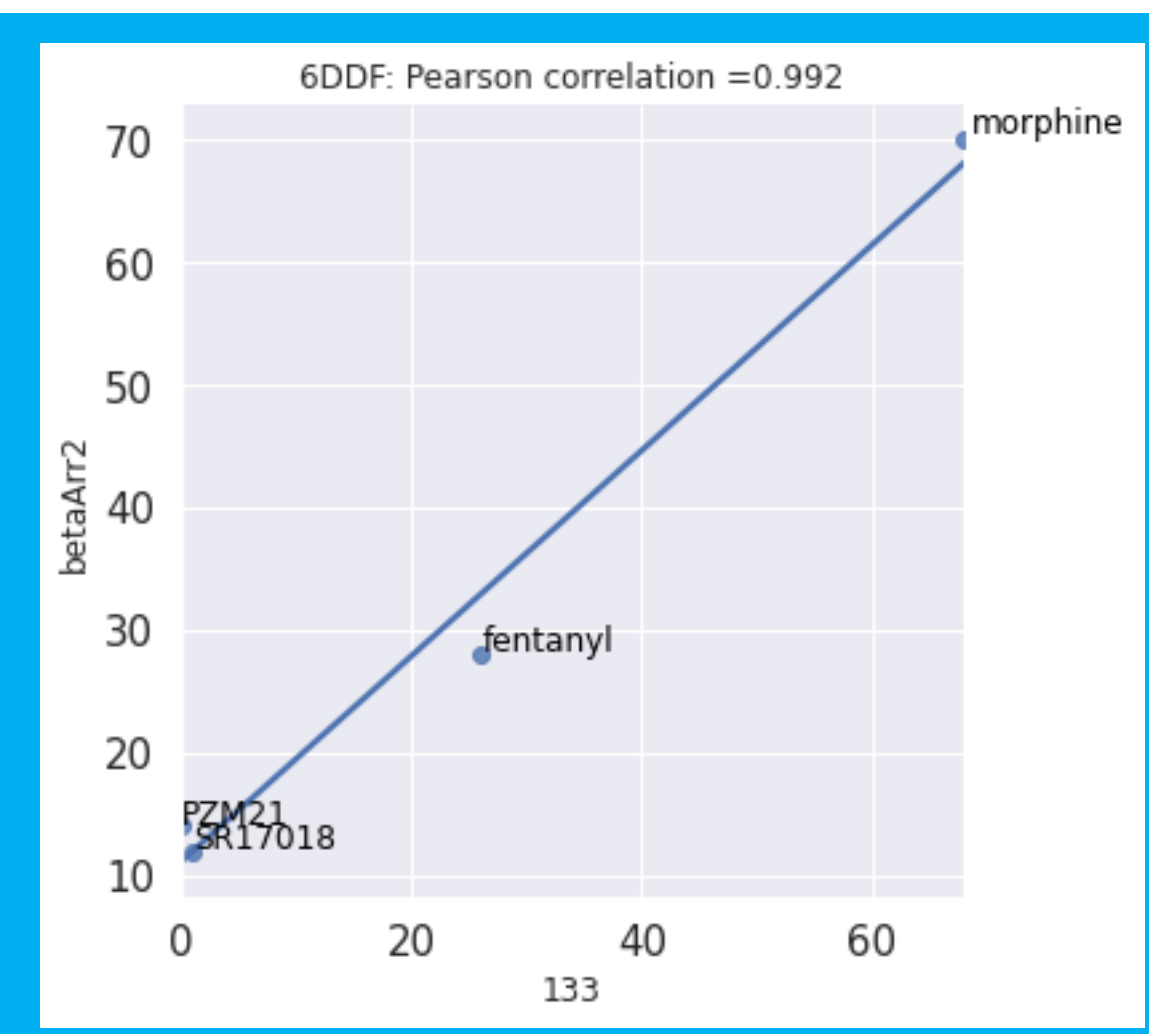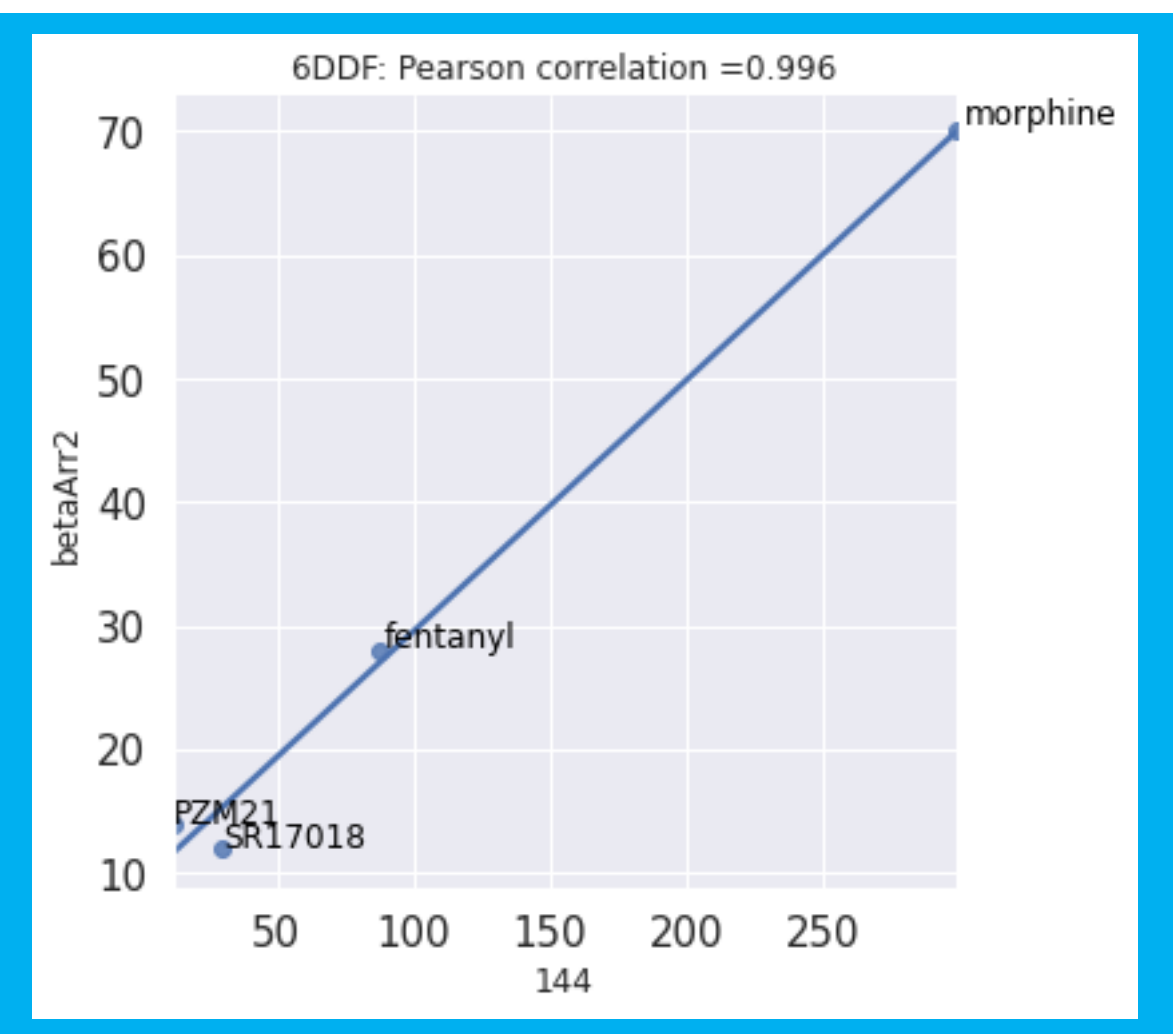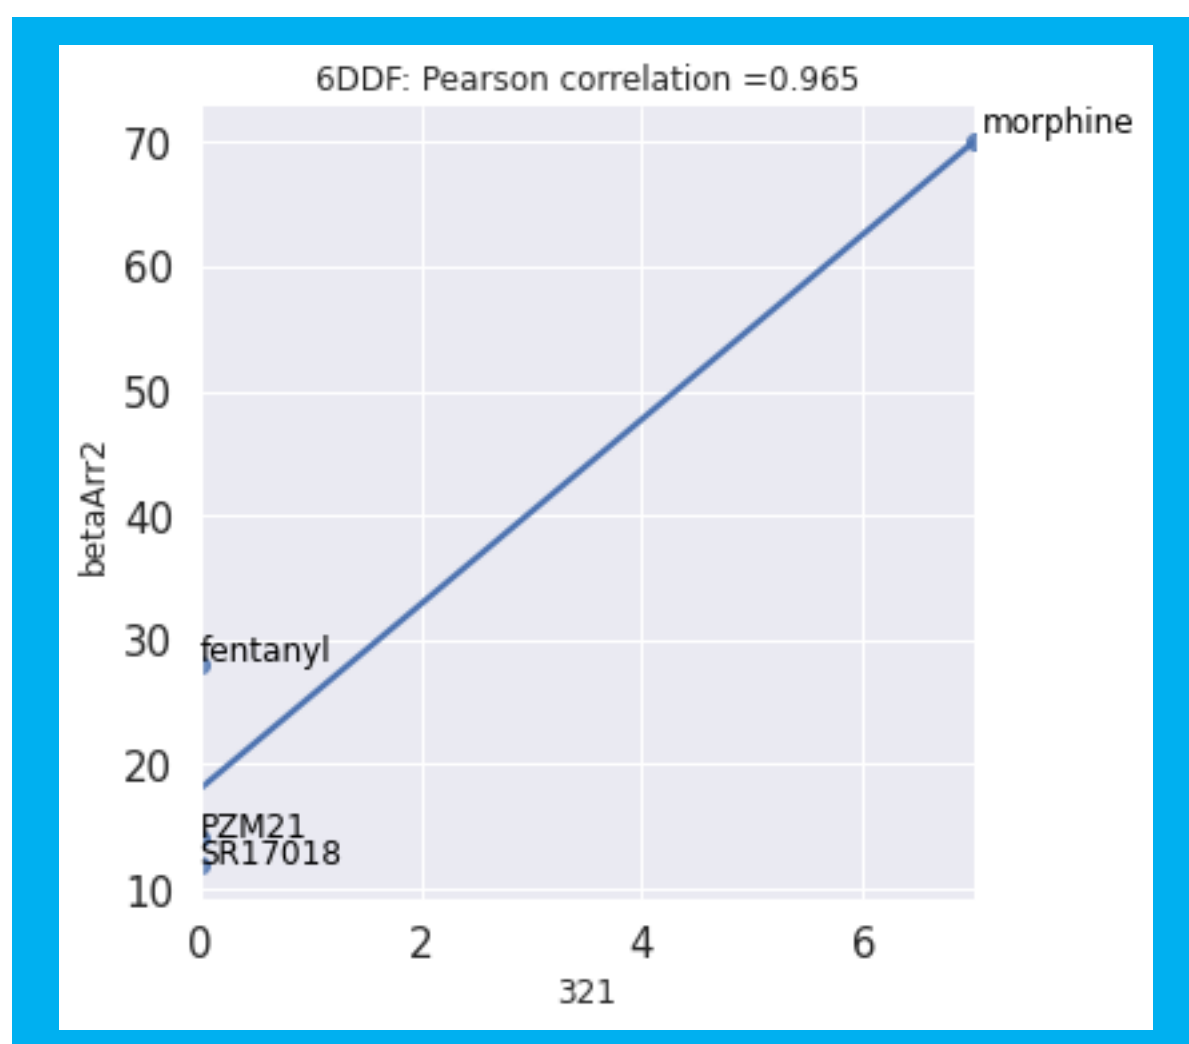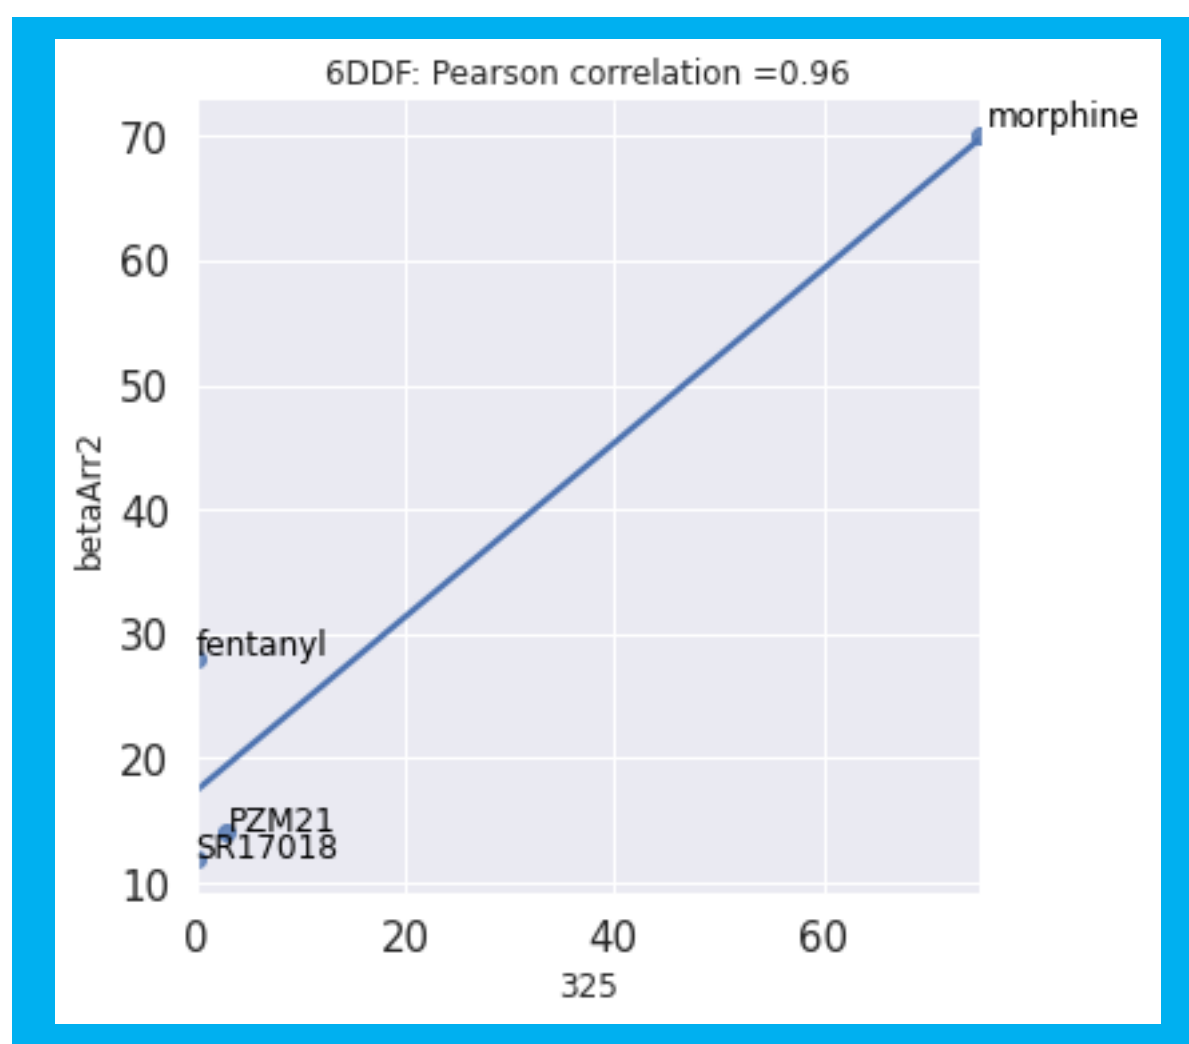

Rab5 trafficking

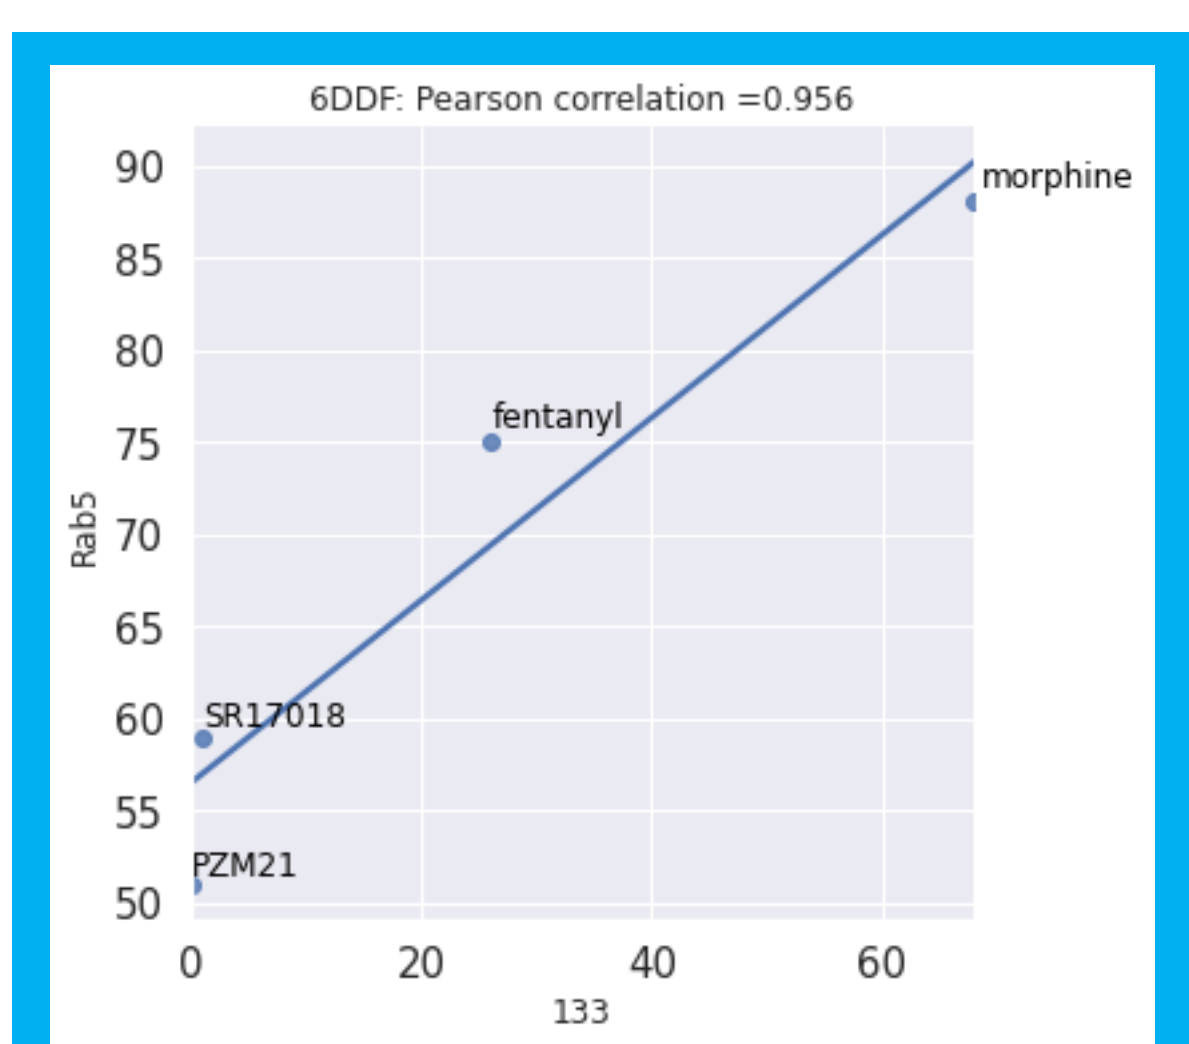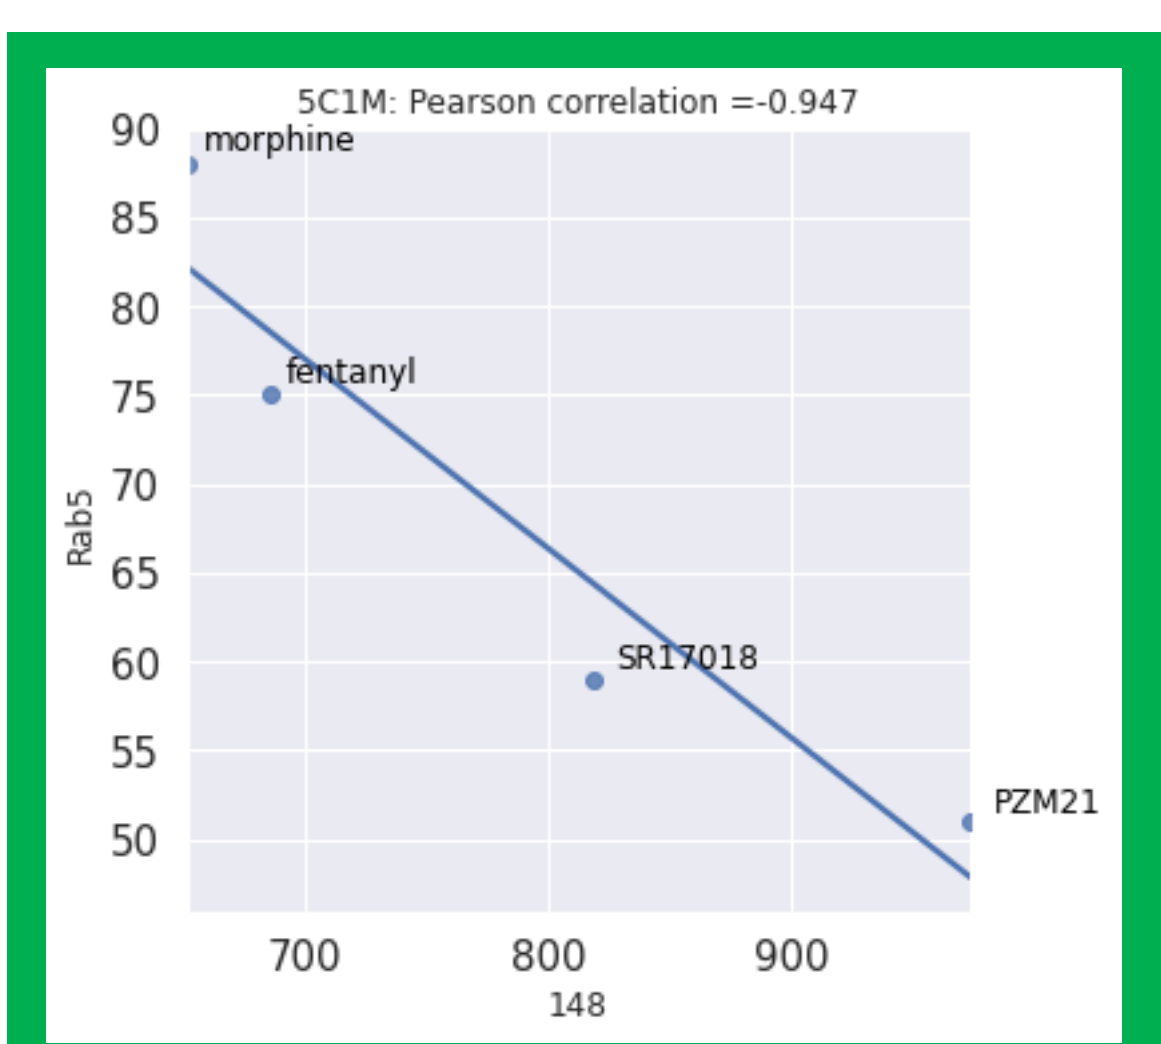

GRK2 recruitment

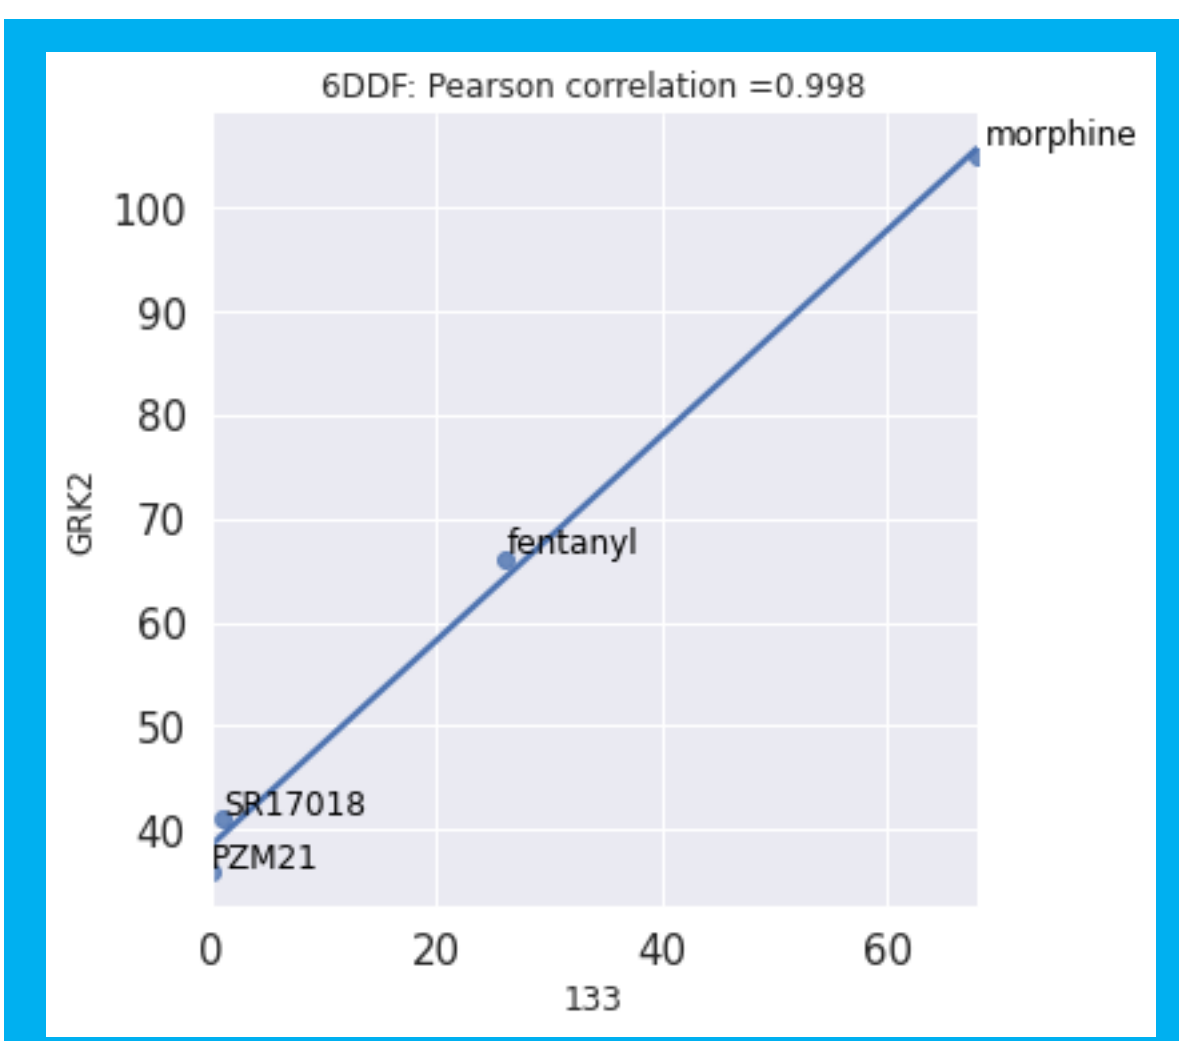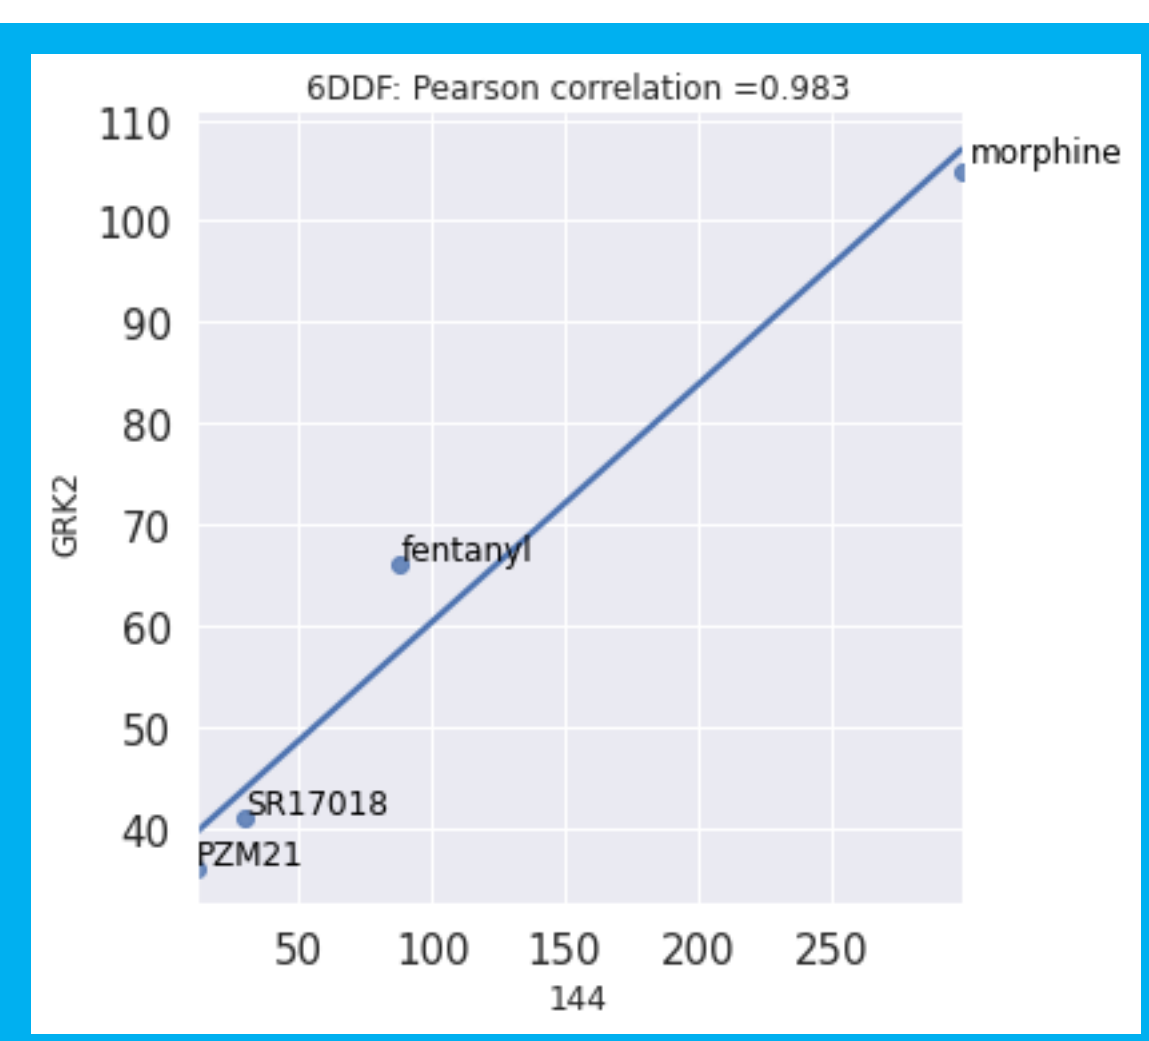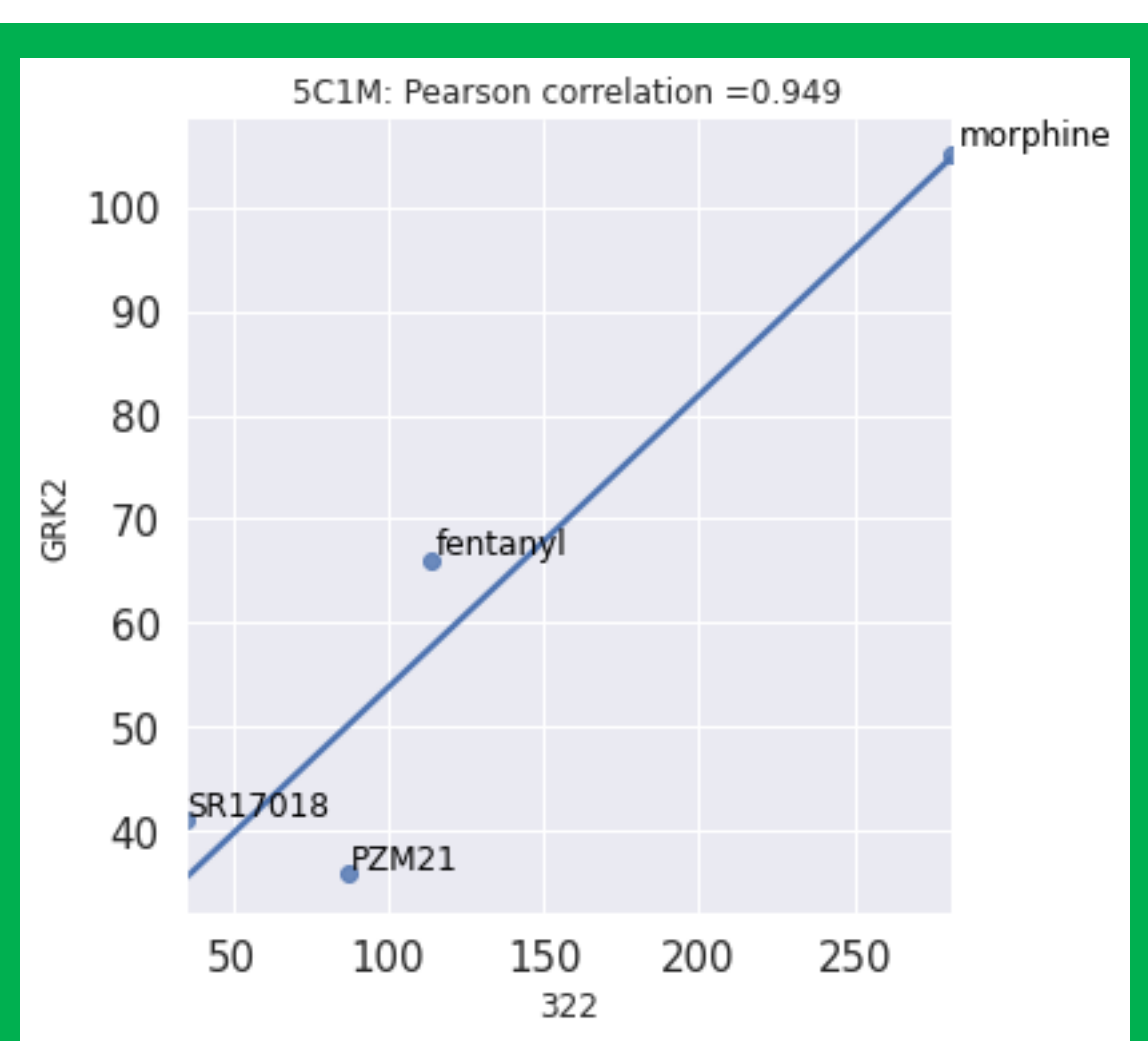

Supplement: s1 [file s1]
